# Supplementary material for: Graphene/N-doped carbon sandwiched nanosheets with ultrahigh nitrogen doping for boosting lithium-ion batteries
Source: Royal Society of Chemistry journal article supplement (doi:10.1039/c5ta09066k), 2016-01-01
Supplement: c5ta09066k1.pdf [file c5ta09066k1.pdf]

## *Supporting Information*

### **Graphene/N-doped Carbon Sandwiched Nanosheets with Ultrahigh Nitrogen Doping for Boosting Lithium-Ion Battery**

**Xianghong Liu<sup>a,\*</sup>, Jun Zhang<sup>a,b</sup>, Shaojun Guo<sup>c,\*</sup>, Nicola Pinna<sup>d</sup>**

<sup>a</sup>College of Physics, Qingdao University, Qingdao 266071, China

<sup>b</sup>School of Materials Science and Engineering, University of Jinan, Jinan 250022, China

<sup>c</sup>Department of Materials Science and Engineering, & Department of Energy and Resources Engineering, College of Engineering, Peking University, Beijing 100871, P.R. China.

<sup>d</sup>Institut für Chemie, Humboldt-Universität zu Berlin, Brook-Taylor-Str. 2, 12489 Berlin, Germany

**Table S1.** Elemental composition of Ppy/GO (polypyrrole coated graphene oxide), N-carbon/rGO (N-doped carbon/reduced graphene oxide) obtained from pyrolysis of Ppy/GO, and N-carbon derived from pyrolysis of polypyrrole.

| Materials    | Elemental composition (wt.%) |      |     |
|--------------|------------------------------|------|-----|
|              | N                            | C    | H   |
| Ppy/GO       | 15.3                         | 54.9 | 3.7 |
| N-carbon/rGO | 15.5                         | 74.5 | 1.6 |
| N-carbon     | 15.7                         | 73.2 | 1.3 |

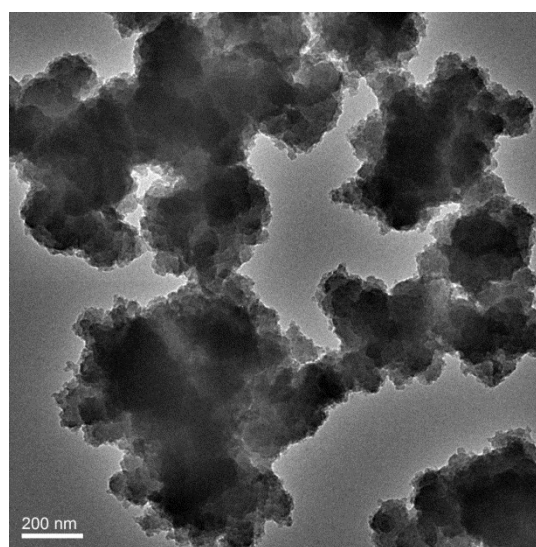

**Figure S1.** TEM of Ppy synthesized without using GO, showing an irregular morphology consisted of aggregated particles.

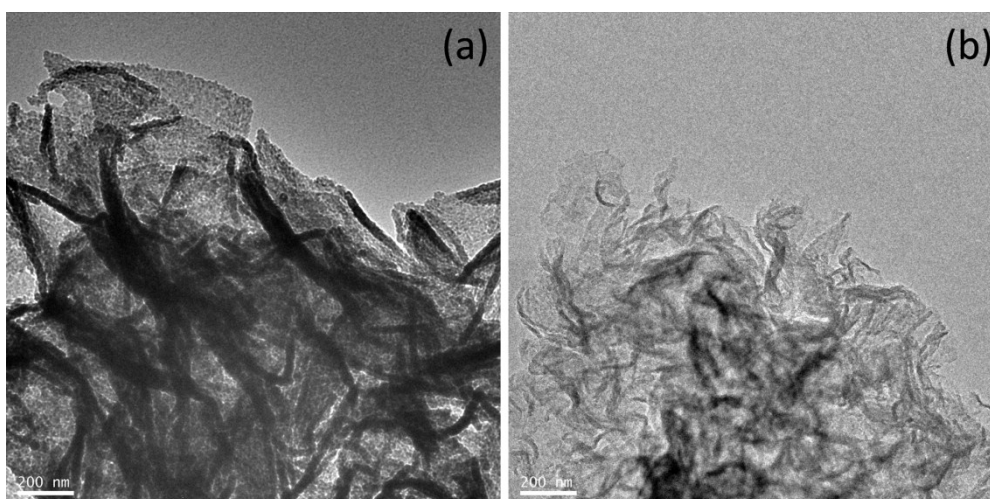

**Figure S2.** Overall TEM of (a) Ppy/GO and (b) N-carbon/rGO nanosheets.

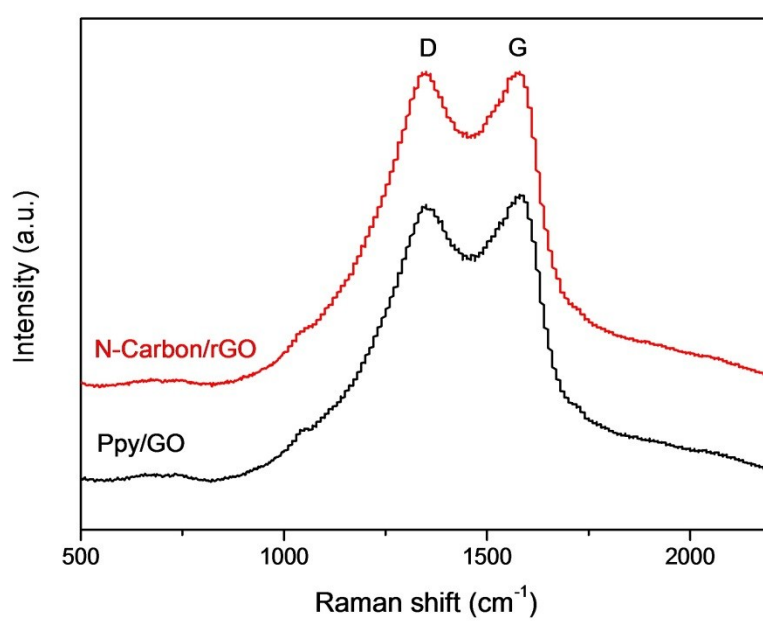

**Figure S3.** Raman spectra of N-carbon/rGO and Ppy/GO

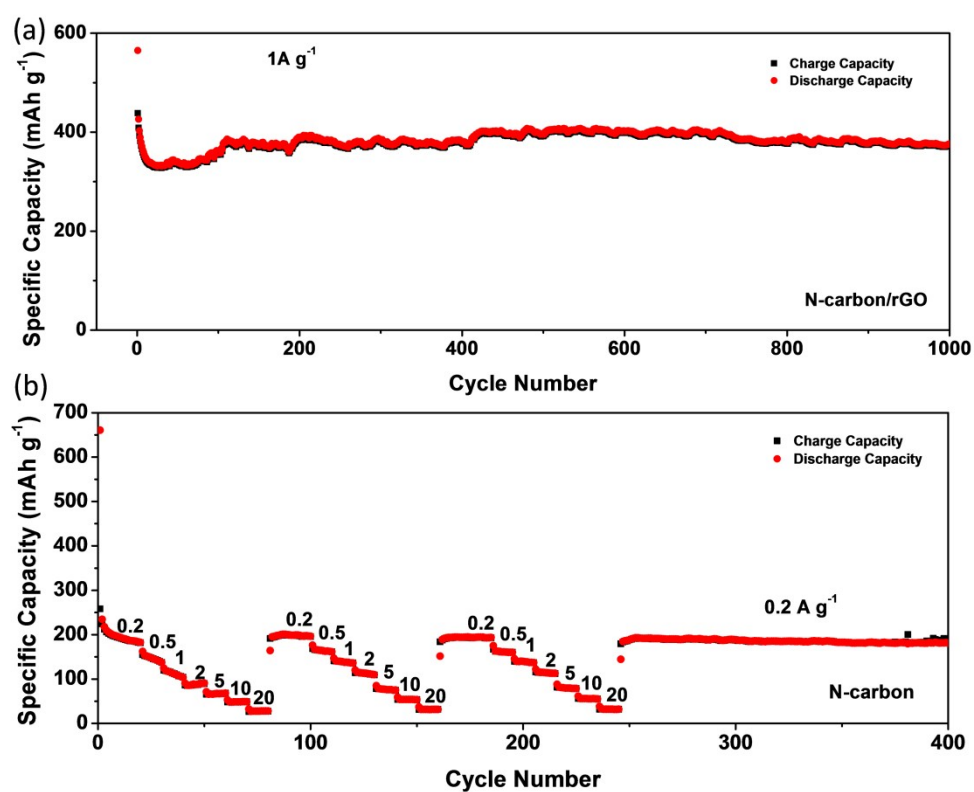

**Figure S4.** (a) Cycling performance of N-carbon/rGO nanosheets at a high current density of 1 A g<sup>-1</sup> and (b) rate capability of N-carbon.
